# Supplementary material for: Integrating female genital schistosomiasis services with paediatric praziquantel delivery in Tanzania: A feasibility study
Source: Research Square preprint supplement (doi:10.21203/rs.3.rs-7123493/v1), 2025-08-27
Supplement: Supplementary file 1 [file 9845735452f4e0710ecdd3c0.pdf]

**Project Title: Investigating the feasibility of Integrating FGS surveillance and intervention with the pediatric praziquantel delivery as a mother and child integrated intervention model for schistosomiasis.**

**TOOL 3: LABORATORY AND PHARMACY CHECKLIST**

|                                                       |            |           |
|-------------------------------------------------------|------------|-----------|
| <b>District:</b>                                      |            |           |
| <b>Facility Name:</b>                                 |            |           |
| <b>Availability of supplies, equipment, and drugs</b> | <b>Yes</b> | <b>No</b> |
| Functional Microscope                                 |            |           |
| Lugols iodine                                         |            |           |
| Dipsticks                                             |            |           |
| Speculum                                              |            |           |
| Colposcope                                            |            |           |
| Urine sample collection containers                    |            |           |
|                                                       |            |           |
| Praziquantel tablets                                  |            |           |
